# Supplementary material for: Novel left-handed double-helical chiral carbon nanotubes for electrochemical biosensing study
Source: Royal Society of Chemistry journal article supplement (doi:10.1039/c5ay01730k), 2015-01-01
Supplement: c5ay01730k1.pdf [file c5ay01730k1.pdf]

## Electronic Supplementary Information (ESI)

### **Novel left-handed double-helical chiral carbon nanotube for electrochemical biosensing study**

Shuang Ren,<sup>a</sup> Huan Wang,<sup>a\*</sup> Yufan Zhang,<sup>a</sup> Liping Guo,<sup>b</sup> Hongyi Zhang,<sup>a\*</sup>  
Zhihong Shi,<sup>a</sup> Yuena Sun,<sup>a</sup> Mingjie Li,<sup>a</sup> Meng Li,<sup>a</sup> Zheng Huang<sup>a</sup>

a Key Laboratory of Analytical Science and Technology of Hebei Province, College of Chemistry and Environmental Science, Hebei University, Baoding 071002, Hebei Province, P. R. China.

b Faculty of Chemistry, Northeast Normal University, Changchun, 130024, P. R. China

#### **\*Corresponding Author:**

Huan Wang, College of Chemistry and Environmental Science, Hebei University, Baoding 071002, Hebei Province, P. R. China, Email:zwhsjzl@163.com;

Hongyi Zhang, College of Chemistry and Environmental Science, Hebei University, Baoding 071002, Hebei Province, P. R. China, Email:freetime20100401@163.com.

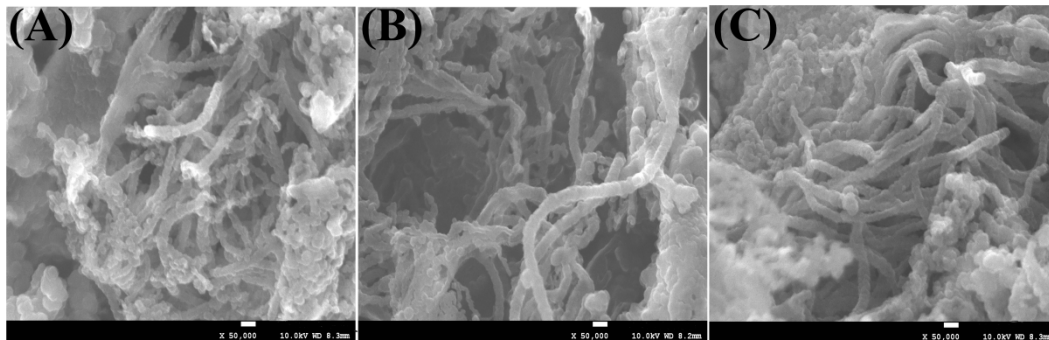

**Fig. S1:** SEM images of CCNT-500 (A), CCNT-700 (B) and CCNT-900 (C) at low resolution.

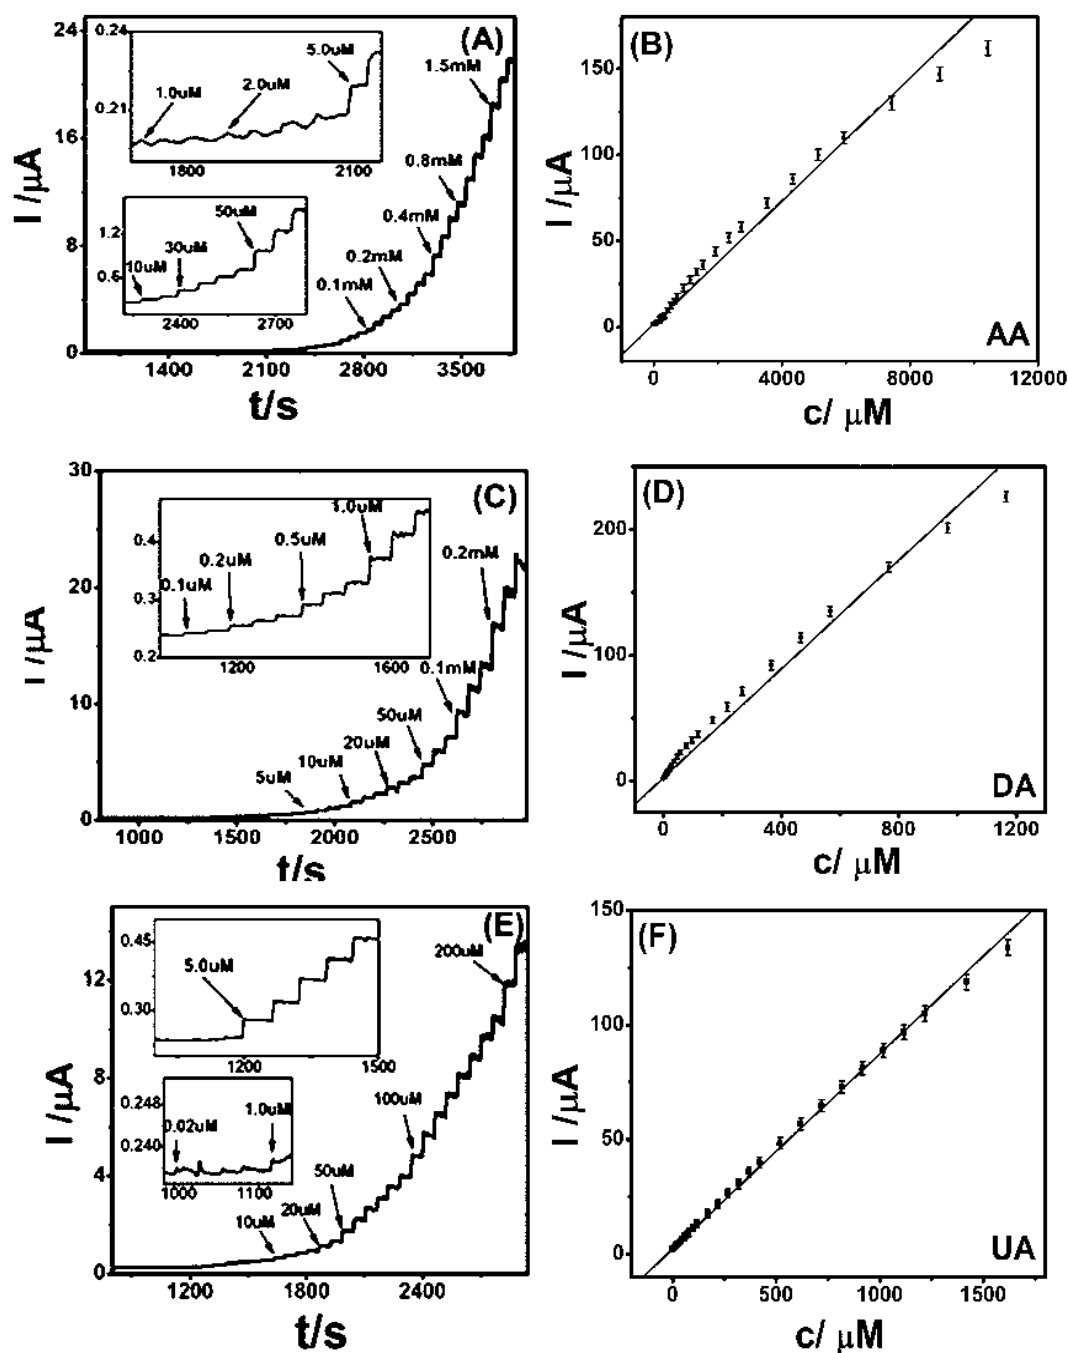

**Fig. S2:** (A) Current-time curves for the CCNT-900/GCE with successive additions different concentration ( $\mu\text{M}$ ) of AA in 0.1 M PBS (pH 7.4). Operating potential: 0.00 V. (B) The linear relationship between AA concentration and current signal. (C) Current-time curves for the CCNT-900/GCE with successive additions different concentration ( $\mu\text{M}$ ) of DA in a 0.1 M PBS (pH 7.4). Operating potential: 0.20 V. Inset is the amperometric response with successive addition of DA at lower concentration. (D) The linear relationship between DA concentration and current signal. (E) Current-time curves for the CCNT-900/GCE with successive additions different concentration ( $\mu\text{M}$ ) of UA in a 0.1 M PBS (pH 7.4). Operating potential: 0.30 V. (F) The linear relationship between UA concentration and current signal.

**Table S1:** Structure properties of the as-synthesized CCNT-x at different carbonization temperature

| Samples<br>(carbonization<br>temperature) | Surface area <sup>[a]</sup><br>m <sup>2</sup> g <sup>-1</sup> | Pore size <sup>[b]</sup><br>nm | N-bonding<br>configurations |       |
|-------------------------------------------|---------------------------------------------------------------|--------------------------------|-----------------------------|-------|
| CCNT-500<br>(500 °C)                      | 77.51                                                         | 20.8                           | pyridinic N                 | 4.24% |
|                                           |                                                               |                                | pyrrolic N                  | 1.40% |
|                                           |                                                               |                                | graphitic N                 | 0.24% |
| CCNT-700<br>(700 °C)                      | 190.88                                                        | 20.8                           | pyridinic N                 | 2.79% |
|                                           |                                                               |                                | pyrrolic N                  | 1.30% |
|                                           |                                                               |                                | graphitic N                 | 0.38% |
| CCNT-900<br>(900 °C)                      | 242.64                                                        | 22.8                           | pyridinic N                 | 0.72% |
|                                           |                                                               |                                | pyrrolic N                  | 0.53% |
|                                           |                                                               |                                | graphitic N                 | 0.48% |

[a] Surface area was obtained based on the Brunauer-Emmett-Teller (BET) method. [b] The pore size was obtained based on the BJH method

**Table S2:** Characteristics of simultaneous determination of AA, DA and UA on CCNT-900/GCE in 0.1 M PBS solution (pH 7.4)

| Solution                          | Additions | Linear range<br>( $\mu$ M) | Linear equation<br>( $\mu$ A, $\mu$ M) | Regression | Limit of<br>detection<br>(S/N=3) | RSD<br>(LOQ) |
|-----------------------------------|-----------|----------------------------|----------------------------------------|------------|----------------------------------|--------------|
| 5 $\mu$ M DA<br>10 $\mu$ M<br>UA  | AA        | 10-1280                    | I=11.35+0.018c                         | 0.9972     | 1.33                             | 1.7%         |
| 80 $\mu$ M<br>AA 20<br>$\mu$ M UA | DA        | 1-124                      | I=8.78+0.206c                          | 0.9915     | 0.13                             | 1.1%         |
| 50 $\mu$ M<br>AA 3 $\mu$ M<br>DA  | UA        | 10-500                     | I=5.65+0.032c                          | 0.9948     | 0.75                             | 1.6%         |

**Table S3:** Electrocatalytic performance comparison of different modified electrodes towards H<sub>2</sub>O<sub>2</sub> detection

| modified electrodes        | Linear range ( $\mu$ M) | Detection limit ( $\mu$ M) | Reference |
|----------------------------|-------------------------|----------------------------|-----------|
| Hb/SA-MWCNTs/GCE           | 40-200                  | 16.4                       | [1]       |
| ZnO/Au/Nafion/HRP/GCE      | 15-1100                 | 9.0                        | [2]       |
| Cu <sub>2</sub> O/graphene | 300-7800                | 20.8                       | [3]       |
| PMo <sub>12</sub> -PPy     | 200-3000                | 50                         | [4]       |
| PDDA-rGO/AgNPs             | 100-4100                | 35                         | [5]       |

|              |          |     |           |
|--------------|----------|-----|-----------|
| CCNT-900/GCE | 20-60000 | 2.0 | This work |
|--------------|----------|-----|-----------|

**Table S4:** Electrocatalytic performance comparison of different modified electrodes towards NADH detection

| modified electrodes                          | Limit of detection ( $\mu\text{M}$ ) | Linear range ( $\mu\text{M}$ ) | Sensitivity ( $\mu\text{A } \mu\text{M}^{-1}$ ) | Reference |
|----------------------------------------------|--------------------------------------|--------------------------------|-------------------------------------------------|-----------|
| graphene/GCE                                 | 20.00                                | 50-1400                        | 0.0126                                          | [6]       |
| PGE                                          | 15                                   | 0.5-100                        | 0.000975                                        | [7]       |
| CR-GO/GCE                                    | 10.00                                | 40-800                         | 0.000189                                        | [8]       |
| APTS-Fe <sub>3</sub> O <sub>4</sub> /PDC/GCE | 0.01                                 | 0.05-25                        | 0.5545                                          | [9]       |
| Au-TiO <sub>2</sub> /GR/GCE                  | 0.20                                 | 10-240                         | 0.0162                                          | [10]      |
| CCNT-900/GCE                                 | 0.035                                | 0.1-400                        | 0.0822                                          | This work |

### Reference

- 1 H.Y. Zhao, W. Zheng, Z.X. Meng, H.M. Zhou, X.X. Xua, Z. Li and Y.F. Zheng, Bioelectrochemistry of hemoglobin immobilized on a sodium alginate-multiwall carbon nanotubes composite film. *Biosens Bioelectron*, 2009, **24**, 2352.
- 2 C.L. Xiang, Y.J. Zou, L.X. Sun and F. Xu, Direct electrochemistry and enhanced electrocatalysis of horseradish peroxidase based on flowerlike ZnO-gold nanoparticle-nafion nanocomposite. *Sens Actuators B*, 2009, **136**, 158.
- 3 M. Liu, R. Liu and W. Chen, Graphene wrapped Cu<sub>2</sub>O nanocubes: Non-enzymatic electrochemical sensors for the detection of glucose and hydrogen peroxide with enhanced stability. *Biosens Bioelectron*, 2013, **45**, 206.
- 4 X. Wang, H. Zhang, E. Wang, Z. Han and C. Hu, Phosphomolybdate-polypyrrole composite bulk-modified carbon paste electrode for a hydrogen peroxide amperometric sensor. *Mater Lett*, 2004, **58**, 1661.
- 5 X. Liu, X. Xu, H. Zhu and X. Yang, Synthesis of graphene nanosheets with incorporated silver nanoparticles for enzymeless hydrogen peroxide detection. *Anal Meth*, 2013, **5**, 2298.
- 6 K. Guo, K. Qian, S. Zhang, J.L. Kong, C.Z. Yu and B.H. Liu, Bio-electrocatalysis of NADH and ethanol based on graphene sheets modified electrodes. *Talanta*, 2011, **85**, 1174.
- 7 N.S. Lawrence and J. Wang, Chemical adsorption of phenothiazine dyes onto carbon nanotubes: toward the low potential detection of NADH. *Electrochem Commun*, 2006, **8**, 71.
- 8 M. Zhou, Y. Zhai and S. Dong, Electrochemical Sensing and biosensing platform based on

chemically reduced graphene oxide. *Anal Chem*, 2009, **81**, 5603.

- 9 L. Cui, S. Ai, K. Shang, X. Meng and C. Wang, Electrochemical determination of NADH using a glassy carbon electrode modified with Fe<sub>3</sub>O<sub>4</sub> nanoparticles and poly-2,6-pyridinedicarboxylic acid, and its application to the determination of antioxidant capacity. *Microchim Acta*, 2011, **174**, 31.
- 10 Y. Fan, X. Yang, C. Yang and J. Liu, Au-TiO<sub>2</sub>/graphene nanocomposite film for electrochemical sensing of hydrogen peroxide and NADH. *Electroanalysis*, 2012, **24**, 1334.
